# Supplementary material for: Metabolic and Lipidomic Markers Differentiate COVID-19 From Non-Hospitalized and Other Intensive Care Patients
Source: PubMed Central journal article supplement (PMC8686182; doi:10.3389/fmolb.2021.737039), 2021-12-02
Supplement: DataSheet1.pdf [file DataSheet1.pdf]

## Supplementary Material

### Metabolic and lipidomic markers differentiate COVID-19 from non-hospitalized and other intensive care patients

Franziska Schmelter<sup>1,6†</sup>, Bandik Föh<sup>1,2†</sup>, Alvaro Mallagaray<sup>3</sup>, Johann Rahmöller<sup>1,9</sup>, Marc Ehlers<sup>1</sup>, Selina Lehrian<sup>1</sup>, Vera von Kopylow<sup>1</sup>, Inga Künsting<sup>1</sup>, Anne Sophie Lixenfeld<sup>1</sup>, Emily Martin<sup>1</sup>, Mohab Ragab<sup>1</sup>, Roza Meyer-Sarai<sup>7,8</sup>, Fabian Kreuzmann<sup>7,8</sup>, Ingo Eitel<sup>7,8</sup>, Stefan Taube<sup>4</sup>, Nadja Käding<sup>5</sup>, Eckard Jantzen<sup>6</sup>, Tobias Graf<sup>7,8††</sup>, Christian Sina<sup>1,2††</sup>, Ulrich L Günther<sup>3††</sup>

**Table S1.** Descriptive statistics for metabolites and lipoproteins in COVID-19, HC, and CS cohorts. For each cohort, mean and standard deviation are shown. P-Values show unadjusted p-values from unpaired t-tests.

|                        |          |      |      |      |      |      | COVID-19 vs. HC |           | COVID-19 vs. CS |          | CS vs. HC   |           |
|------------------------|----------|------|------|------|------|------|-----------------|-----------|-----------------|----------|-------------|-----------|
|                        | COVID-19 |      | HC   |      | CS   |      | Change in %     | P value   | Change in %     | P value  | Change in % | P value   |
|                        | mean     | SD   | mean | SD   | mean | SD   |                 |           |                 |          |             |           |
| <b>Metabolites</b>     |          |      |      |      |      |      |                 |           |                 |          |             |           |
| Alanine (mmol/l)       | 0.43     | 0.14 | 0.53 | 0.10 | 0.38 | 0.23 | -19.6           | 0.001207  | 13.9            | 0.59863  | -29.4       | 0.000005  |
| Creatine (mmol/l)      | 0.08     | 0.08 | 0.03 | 0.04 | 0.05 | 0.07 | 184.3           | 0.000672  | 68.4            | 0.134926 | 68.8        | 0.126552  |
| Creatinine (mmol/l)    | 0.12     | 0.04 | 0.09 | 0.02 | 0.11 | 0.06 | 39.2            | 0.000003  | 3.5             | 0.798795 | 34.4        | <0,000001 |
| Glutamine (mmol/l)     | 0.55     | 0.12 | 0.71 | 0.11 | 0.61 | 0.24 | -22.9           | 0.000006  | -9.6            | 0.299422 | -14.7       | 0.000557  |
| Glycine (mmol/l)       | 0.40     | 0.15 | 0.35 | 0.08 | 0.29 | 0.12 | 12.1            | 0.112016  | 35.8            | 0.026379 | -17.4       | 0.008796  |
| Histidine (mmol/l)     | 0.06     | 0.01 | 0.10 | 0.02 | 0.07 | 0.03 | -37.2           | <0,000001 | -9.7            | 0.278744 | -30.4       | <0,000001 |
| Isoleucine (mmol/l)    | 0.09     | 0.03 | 0.07 | 0.02 | 0.09 | 0.05 | 24.8            | 0.017030  | 8.4             | 0.587356 | 15.1        | 0.038670  |
| Leucine (mmol/l)       | 0.12     | 0.05 | 0.14 | 0.04 | 0.12 | 0.06 | -13.8           | 0.147592  | 3.3             | 0.842568 | -16.5       | 0.032872  |
| Phenylalanine (mmol/l) | 0.11     | 0.04 | 0.08 | 0.02 | 0.08 | 0.04 | 30.6            | 0.000148  | 33.7            | 0.029756 | -2.3        | 0.779637  |
| Tyrosine (mmol/l)      | 0.06     | 0.02 | 0.07 | 0.02 | 0.07 | 0.03 | -16.1           | 0.061054  | -20.8           | 0.118895 | 6.0         | 0.445455  |
| Valine (mmol/l)        | 0.28     | 0.07 | 0.29 | 0.06 | 0.25 | 0.10 | -5.8            | 0.307764  | 10.4            | 0.393469 | -14.7       | 0.005767  |
| Acetic acid (mmol/l)   | 0.02     | 0.04 | 0.01 | 0.02 | 0.06 | 0.28 | 98.5            | 0.107327  | -65.8           | 0.274587 | 480.4       | 0.000139  |
| Formic acid (mmol/l)   | 0.03     | 0.02 | 0.01 | 0.01 | 0.02 | 0.02 | 115.2           | 0.004080  | 25.4            | 0.501467 | 71.6        | 0.014801  |

|                                |         |        |         |        |         |        |       |           |       |          |       |           |
|--------------------------------|---------|--------|---------|--------|---------|--------|-------|-----------|-------|----------|-------|-----------|
| Lactic acid (mmol/l)           | 1.99    | 0.72   | 4.43    | 1.48   | 1.79    | 1.59   | -55.2 | <0,000001 | 10.9  | 0.91487  | -59.6 | <0,000001 |
| Glucose (mmol/l)               | 10.01   | 2.68   | 4.08    | 1.44   | 8.74    | 3.68   | 145.3 | <0,000001 | 14.6  | 0.152078 | 114.1 | <0,000001 |
| Glutamine/Glutamate ratio      | 4.82    | 2.12   | 4.83    | 2.12   | 8.48    | 3.55   | -0.2  | 0.987164  | -43.2 | 0.000405 | 75.7  | <0,000001 |
| Lactic acid/Pyruvic Acid ratio | 25.63   | 1.56   | 101.31  | 33.52  | 19.44   | 7.10   | -74.7 | <0,000001 | 31.8  | 0.247346 | -80.8 | <0,000001 |
| Fischer's ratio                | 3.12    | 0.20   | 3.40    | 0.63   | 3.06    | 1.03   | -8.1  | 0.134514  | 2.1   | 0.024105 | -10.0 | 0.026230  |
| <b>Lipoproteins</b>            |         |        |         |        |         |        |       |           |       |          |       |           |
| ApoB100 (mg/dl)                | 102.37  | 28.02  | 87.46   | 25.09  | 73.95   | 24.61  | 17.0  | 0.057028  | 38.4  | 0.002642 | -15.4 | 0.021378  |
| LDL/HDL                        | 1.54    | 0.76   | 2.08    | 0.91   | 1.74    | 3.50   | -26.1 | 0.049293  | -11.7 | 0.702129 | -16.3 | 0.096041  |
| ApoB100/ApoA1                  | 1.02    | 0.31   | 0.60    | 0.24   | 0.77    | 0.37   | 70.3  | <0,000001 | 32.5  | 0.03618  | 28.5  | 0.004005  |
| ApoB Particles (mmol/l)        | 1861.33 | 509.47 | 1590.24 | 456.15 | 1344.59 | 447.57 | 17.0  | 0.057051  | 38.4  | 0.002644 | -15.4 | 0.021385  |
| VLDL Particles (mmol/l)        | 309.35  | 79.95  | 159.96  | 92.08  | 187.18  | 70.85  | 93.4  | <0,000001 | 65.3  | 0.000168 | 17.0  | 0.087113  |
| IDL Particles (mmol/l)         | 195.04  | 77.35  | 103.49  | 49.75  | 102.00  | 64.37  | 88.5  | <0,000001 | 91.2  | 0.001085 | -1.4  | 0.716573  |
| LDL Particles (mmol/l)         | 1399.94 | 564.82 | 1322.71 | 376.44 | 1042.19 | 396.53 | 5.8   | 0.527514  | 34.3  | 0.022561 | -21.2 | 0.001045  |
| LDL-1 Particles (mmol/l)       | 393.29  | 207.03 | 209.49  | 64.86  | 243.32  | 123.63 | 87.7  | <0,000001 | 61.6  | 0.006626 | 16.1  | 0.021411  |
| LDL-2 Particles (mmol/l)       | 192.71  | 62.84  | 195.37  | 63.51  | 218.54  | 74.20  | -1.4  | 0.891056  | -11.8 | 0.292636 | 11.9  | 0.207588  |
| LDL-3 Particles (mmol/l)       | 184.23  | 117.09 | 182.45  | 74.02  | 143.23  | 74.83  | 1.0   | 0.941651  | 28.6  | 0.125851 | -21.5 | 0.011993  |

|                          |        |        |        |        |        |        |       |           |       |          |       |           |
|--------------------------|--------|--------|--------|--------|--------|--------|-------|-----------|-------|----------|-------|-----------|
| LDL-4 Particles (mmol/l) | 135.55 | 150.40 | 178.72 | 107.91 | 78.53  | 115.83 | -24.2 | 0.212933  | 72.6  | 0.144626 | -56.1 | 0.000081  |
| LDL-5 Particles (mmol/l) | 157.75 | 134.44 | 221.24 | 102.65 | 111.30 | 113.42 | -28.7 | 0.052804  | 41.7  | 0.189765 | -49.7 | 0.000008  |
| LDL-6 Particles (mmol/l) | 270.31 | 199.08 | 354.17 | 180.18 | 237.77 | 201.75 | -23.7 | 0.134417  | 13.7  | 0.469488 | -32.9 | 0.003500  |
| Chol (mg/dl)             | 166.43 | 45.98  | 208.42 | 41.59  | 118.73 | 35.19  | -20.1 | 0.001428  | 40.2  | 0.00168  | -43.0 | <0,000001 |
| VLDL (mg/dl)             | 29.79  | 10.83  | 22.43  | 15.06  | 17.12  | 9.11   | 32.8  | 0.103585  | 74.0  | 0.001224 | -23.7 | 0.232713  |
| VLDL-1 Chol (mg/dl)      | 7.43   | 4.60   | 9.71   | 8.92   | 5.74   | 6.81   | -23.5 | 0.386440  | 29.6  | 0.256175 | -41.0 | 0.047072  |
| VLDL-2 Chol (mg/dl)      | 4.43   | 1.52   | 3.41   | 2.72   | 2.29   | 1.79   | 30.0  | 0.205958  | 93.5  | 0.000115 | -32.8 | 0.092050  |
| VLDL-3 Chol (mg/dl)      | 5.67   | 3.02   | 3.68   | 2.78   | 2.21   | 2.15   | 54.2  | 0.021625  | 156.0 | 0.000636 | -39.8 | 0.072188  |
| VLDL-4 Chol (mg/dl)      | 8.90   | 2.98   | 4.19   | 2.50   | 4.14   | 3.30   | 112.5 | <0,000001 | 115.3 | 0.000715 | -1.3  | 0.407800  |
| VLDL-5 Chol (mg/dl)      | 2.47   | 0.98   | 1.25   | 0.58   | 1.93   | 1.12   | 96.7  | <0,000001 | 28.0  | 0.244815 | 53.7  | 0.000002  |
| IDL (mg/dl)              | 20.73  | 8.45   | 12.98  | 7.94   | 9.53   | 9.24   | 59.7  | 0.001954  | 117.6 | 0.001995 | -26.6 | 0.176692  |
| LDL (mg/dl)              | 74.69  | 42.79  | 114.20 | 32.81  | 57.33  | 28.88  | -34.6 | 0.000226  | 30.3  | 0.126116 | -49.8 | <0,000001 |
| LDL-1 Chol (mg/dl)       | 29.78  | 18.46  | 22.03  | 7.12   | 17.59  | 10.20  | 35.2  | 0.005222  | 69.3  | 0.011104 | -20.1 | 0.015293  |
| LDL-2 Chol (mg/dl)       | 13.10  | 7.36   | 19.54  | 7.22   | 17.73  | 7.18   | -33.0 | 0.004295  | -26.1 | 0.07556  | -9.3  | 0.173650  |
| LDL-3 Chol (mg/dl)       | 10.20  | 9.37   | 17.08  | 7.68   | 8.64   | 6.04   | -40.3 | 0.004988  | 18.1  | 0.402016 | -49.4 | 0.000002  |
| LDL-4 Chol (mg/dl)       | 6.68   | 10.13  | 15.58  | 9.51   | 4.08   | 8.15   | -57.1 | 0.002915  | 63.7  | 0.285967 | -73.8 | <0,000001 |
| LDL-5 Chol (mg/dl)       | 8.11   | 9.68   | 17.32  | 8.21   | 5.90   | 8.73   | -53.2 | 0.000474  | 37.5  | 0.363769 | -65.9 | <0,000001 |
| LDL-6 Chol (mg/dl)       | 16.37  | 13.16  | 22.80  | 10.95  | 13.07  | 12.24  | -28.2 | 0.062560  | 25.3  | 0.307751 | -42.7 | 0.000114  |
| HDL (mg/dl)              | 44.96  | 11.51  | 59.47  | 15.65  | 38.43  | 15.66  | -24.4 | 0.002407  | 17.0  | 0.126568 | -35.4 | <0,000001 |

|                    |       |       |       |      |       |      |       |           |       |          |       |           |
|--------------------|-------|-------|-------|------|-------|------|-------|-----------|-------|----------|-------|-----------|
| HDL-1 Chol (mg/dl) | 18.71 | 6.84  | 20.19 | 9.72 | 13.84 | 9.46 | -7.3  | 0.609243  | 35.2  | 0.076123 | -31.5 | 0.004703  |
| HDL-2 Chol (mg/dl) | 10.32 | 2.45  | 9.61  | 3.30 | 7.23  | 2.20 | 7.4   | 0.471804  | 42.6  | 0.000238 | -24.7 | 0.002135  |
| HDL-3 Chol (mg/dl) | 8.28  | 2.36  | 10.40 | 2.70 | 6.75  | 2.16 | -20.4 | 0.010468  | 22.5  | 0.034662 | -35.1 | <0,000001 |
| HDL-4 Chol (mg/dl) | 6.86  | 6.41  | 17.76 | 4.99 | 9.93  | 5.30 | -61.3 | <0,000001 | -30.9 | 0.190377 | -44.1 | <0,000001 |
| VLDL FC (mg/dl)    | 12.88 | 5.16  | 9.97  | 6.28 | 7.69  | 4.51 | 29.1  | 0.126588  | 67.4  | 0.003709 | -22.9 | 0.206156  |
| VLDL-1 FC (mg/dl)  | 2.35  | 1.92  | 4.02  | 3.72 | 1.21  | 2.13 | -41.6 | 0.129537  | 94.0  | 0.044809 | -69.9 | 0.001178  |
| VLDL-2 FC (mg/dl)  | 2.59  | 0.99  | 1.57  | 1.35 | 1.39  | 0.92 | 65.3  | 0.012363  | 86.2  | 0.000738 | -11.2 | 0.695323  |
| VLDL-3 FC (mg/dl)  | 2.95  | 1.46  | 1.75  | 1.52 | 1.35  | 1.13 | 68.1  | 0.011125  | 117.7 | 0.001326 | -22.8 | 0.412432  |
| VLDL-4 FC (mg/dl)  | 4.63  | 1.78  | 1.90  | 1.26 | 2.14  | 1.75 | 144.1 | <0,000001 | 116.4 | 0.00123  | 12.8  | 0.119650  |
| VLDL-5 FC (mg/dl)  | 0.99  | 0.42  | 0.63  | 0.53 | 0.87  | 0.63 | 56.9  | 0.025738  | 13.7  | 0.623537 | 38.1  | 0.023975  |
| IDL FC (mg/dl)     | 6.12  | 2.43  | 3.92  | 2.40 | 2.63  | 2.53 | 56.2  | 0.003369  | 132.4 | 0.000719 | -32.8 | 0.076886  |
| LDL FC (mg/dl)     | 27.24 | 12.93 | 32.41 | 8.76 | 22.18 | 8.90 | -15.9 | 0.070340  | 22.8  | 0.113704 | -31.6 | <0,000001 |
| LDL-1 FC (mg/dl)   | 8.70  | 4.68  | 6.36  | 2.03 | 5.88  | 3.06 | 36.9  | 0.001978  | 48.0  | 0.022739 | -7.5  | 0.300410  |
| LDL-2 FC (mg/dl)   | 4.74  | 2.19  | 5.79  | 2.25 | 5.94  | 2.46 | -18.0 | 0.131886  | -20.2 | 0.183143 | 2.7   | 0.858783  |
| LDL-3 FC (mg/dl)   | 4.48  | 3.14  | 5.03  | 2.09 | 3.89  | 2.35 | -10.9 | 0.417351  | 15.3  | 0.326756 | -22.7 | 0.005479  |
| LDL-4 FC (mg/dl)   | 2.83  | 2.96  | 4.48  | 2.24 | 1.82  | 3.03 | -36.8 | 0.021793  | 55.8  | 0.199507 | -59.4 | <0,000001 |
| LDL-5 FC (mg/dl)   | 2.64  | 2.67  | 4.46  | 1.91 | 2.25  | 3.03 | -40.9 | 0.003359  | 17.4  | 0.531936 | -49.7 | 0.000002  |
| LDL-6 FC (mg/dl)   | 3.48  | 2.87  | 5.63  | 2.44 | 3.45  | 3.26 | -38.2 | 0.005544  | 1.0   | 0.790193 | -38.8 | 0.000087  |
| HDL FC (mg/dl)     | 7.98  | 3.98  | 13.56 | 4.43 | 9.62  | 5.10 | -41.1 | 0.000064  | -17.0 | 0.44427  | -29.0 | 0.000055  |
| HDL-1 FC (mg/dl)   | 2.57  | 1.93  | 5.34  | 2.29 | 2.65  | 2.67 | -51.8 | 0.000110  | -3.1  | 0.903164 | -50.3 | <0,000001 |

|                   |        |       |        |        |        |       |       |           |       |          |       |           |
|-------------------|--------|-------|--------|--------|--------|-------|-------|-----------|-------|----------|-------|-----------|
| HDL-2 FC (mg/dl)  | 1.98   | 0.71  | 2.14   | 0.91   | 1.47   | 0.86  | -7.2  | 0.572573  | 34.6  | 0.031958 | -31.1 | 0.001324  |
| HDL-3 FC (mg/dl)  | 0.94   | 0.64  | 2.06   | 0.85   | 0.84   | 0.65  | -54.5 | 0.000021  | 11.8  | 0.450484 | -59.3 | <0,000001 |
| HDL-4 FC (mg/dl)  | 0.98   | 1.17  | 2.78   | 1.30   | 1.21   | 1.00  | -64.6 | 0.000012  | -19.0 | 0.580907 | -56.4 | <0,000001 |
| TG (mg/dl)        | 187.92 | 46.97 | 157.16 | 105.95 | 124.18 | 58.05 | 19.6  | 0.323657  | 51.3  | 0.000789 | -21.0 | 0.211051  |
| VLDL TG (mg/dl)   | 114.95 | 48.34 | 100.25 | 76.49  | 63.52  | 48.18 | 14.7  | 0.517630  | 81.0  | 0.001348 | -36.6 | 0.049472  |
| VLDL-1 TG (mg/dl) | 51.06  | 31.19 | 58.88  | 54.21  | 30.28  | 36.97 | -13.3 | 0.625985  | 68.6  | 0.017696 | -48.6 | 0.020399  |
| VLDL-2 TG (mg/dl) | 18.83  | 8.83  | 14.66  | 12.17  | 9.18   | 6.30  | 28.4  | 0.253410  | 105.1 | 0.000546 | -37.4 | 0.073463  |
| VLDL-3 TG (mg/dl) | 18.80  | 8.94  | 11.75  | 8.68   | 8.68   | 6.26  | 60.0  | 0.009125  | 116.6 | 0.000644 | -26.1 | 0.256869  |
| VLDL-4 TG (mg/dl) | 17.31  | 6.66  | 8.15   | 4.27   | 9.08   | 5.65  | 112.3 | <0,000001 | 90.6  | 0.001783 | 11.4  | 0.077313  |
| VLDL-5 TG (mg/dl) | 4.88   | 1.11  | 2.57   | 0.83   | 3.94   | 1.29  | 89.9  | <0,000001 | 23.8  | 0.057408 | 53.4  | <0,000001 |
| IDL TG (mg/dl)    | 17.01  | 6.61  | 17.95  | 17.82  | 7.91   | 6.15  | -5.3  | 0.855813  | 115.1 | 0.000152 | -56.0 | 0.018743  |
| LDL TG (mg/dl)    | 47.47  | 19.38 | 19.75  | 7.63   | 32.49  | 15.02 | 140.4 | <0,000001 | 46.1  | 0.011475 | 64.5  | <0,000001 |
| LDL-1 TG (mg/dl)  | 17.23  | 8.46  | 5.52   | 2.84   | 11.93  | 5.93  | 212.1 | <0,000001 | 44.4  | 0.030652 | 116.1 | <0,000001 |
| LDL-2 TG (mg/dl)  | 6.73   | 3.50  | 2.59   | 0.87   | 4.23   | 2.22  | 160.3 | <0,000001 | 59.2  | 0.009659 | 63.6  | <0,000001 |
| LDL-3 TG (mg/dl)  | 5.17   | 2.23  | 2.49   | 0.79   | 3.75   | 1.48  | 107.4 | <0,000001 | 38.1  | 0.021338 | 50.2  | <0,000001 |
| LDL-4 TG (mg/dl)  | 6.97   | 4.42  | 2.27   | 1.46   | 4.03   | 2.84  | 207.2 | <0,000001 | 72.8  | 0.019509 | 77.8  | 0.000007  |
| LDL-5 TG (mg/dl)  | 5.28   | 2.62  | 2.65   | 1.47   | 3.34   | 2.01  | 99.0  | <0,000001 | 58.1  | 0.014751 | 25.8  | 0.075399  |
| LDL-6 TG (mg/dl)  | 6.78   | 1.83  | 4.43   | 2.27   | 4.77   | 2.55  | 52.9  | 0.000797  | 41.9  | 0.008616 | 7.7   | 0.590666  |
| HDL TG (mg/dl)    | 19.15  | 7.74  | 12.67  | 5.15   | 11.64  | 7.04  | 51.2  | 0.000174  | 64.5  | 0.005374 | -8.1  | 0.783238  |
| HDL-1 TG (mg/dl)  | 8.06   | 3.98  | 4.57   | 2.49   | 4.45   | 3.52  | 76.5  | 0.000042  | 81.1  | 0.008929 | -2.5  | 0.792152  |

|                   |       |       |       |       |       |       |       |           |       |          |       |           |
|-------------------|-------|-------|-------|-------|-------|-------|-------|-----------|-------|----------|-------|-----------|
| HDL-2 TG (mg/dl)  | 4.04  | 1.61  | 2.29  | 1.05  | 2.46  | 1.71  | 76.4  | 0.000001  | 64.4  | 0.006826 | 7.3   | 0.249182  |
| HDL-3 TG (mg/dl)  | 3.60  | 1.15  | 2.42  | 1.02  | 2.48  | 1.63  | 48.6  | 0.000302  | 45.5  | 0.018555 | 2.1   | 0.570755  |
| HDL-4 TG (mg/dl)  | 3.40  | 0.78  | 3.58  | 1.26  | 2.66  | 1.13  | -4.9  | 0.644202  | 28.2  | 0.030169 | -25.8 | 0.006940  |
| VLDL PL (mg/dl)   | 26.95 | 11.49 | 23.44 | 14.02 | 14.33 | 8.67  | 15.0  | 0.406695  | 88.0  | 0.000883 | -38.9 | 0.013540  |
| VLDL-1 PL (mg/dl) | 6.97  | 4.46  | 9.28  | 8.28  | 4.21  | 3.37  | -24.9 | 0.344723  | 65.6  | 0.016536 | -54.7 | 0.007273  |
| VLDL-2 PL (mg/dl) | 4.43  | 2.30  | 3.87  | 2.89  | 2.07  | 1.49  | 14.3  | 0.521768  | 114.2 | 0.000872 | -46.6 | 0.012570  |
| VLDL-3 PL (mg/dl) | 6.05  | 3.09  | 4.24  | 2.63  | 2.57  | 2.00  | 42.7  | 0.029216  | 135.7 | 0.000778 | -39.5 | 0.029777  |
| VLDL-4 PL (mg/dl) | 8.67  | 2.75  | 4.40  | 2.07  | 4.60  | 2.78  | 97.3  | <0,000001 | 88.7  | 0.000881 | 4.6   | 0.172132  |
| VLDL-5 PL (mg/dl) | 2.49  | 1.28  | 1.62  | 0.65  | 2.03  | 1.23  | 53.3  | 0.000213  | 22.5  | 0.421991 | 25.1  | 0.002240  |
| IDL PL (mg/dl)    | 8.19  | 2.64  | 9.15  | 5.41  | 2.59  | 2.47  | -10.5 | 0.546953  | 216.2 | 0.000002 | -71.7 | 0.000002  |
| LDL PL (mg/dl)    | 54.94 | 24.69 | 64.46 | 16.01 | 41.48 | 16.86 | -14.8 | 0.070372  | 32.4  | 0.04475  | -35.6 | <0,000001 |
| LDL-1 PL (mg/dl)  | 19.73 | 11.19 | 12.62 | 3.66  | 12.40 | 6.39  | 56.3  | 0.000007  | 59.0  | 0.012279 | -1.7  | 0.975649  |
| LDL-2 PL (mg/dl)  | 9.22  | 3.38  | 10.85 | 3.54  | 10.72 | 3.89  | -15.0 | 0.132558  | -14.0 | 0.259271 | -1.2  | 0.653038  |
| LDL-3 PL (mg/dl)  | 7.38  | 5.46  | 9.62  | 3.84  | 6.26  | 3.39  | -23.3 | 0.070911  | 17.8  | 0.326533 | -34.9 | 0.000088  |
| LDL-4 PL (mg/dl)  | 5.35  | 6.31  | 8.72  | 4.88  | 2.83  | 4.36  | -38.7 | 0.030307  | 88.8  | 0.117985 | -67.5 | <0,000001 |
| LDL-5 PL (mg/dl)  | 5.17  | 5.40  | 9.68  | 4.15  | 4.12  | 4.30  | -46.6 | 0.000810  | 25.3  | 0.415115 | -57.4 | <0,000001 |
| LDL-6 PL (mg/dl)  | 9.96  | 7.40  | 13.31 | 5.51  | 8.29  | 6.52  | -25.2 | 0.057555  | 20.2  | 0.350257 | -37.8 | 0.000083  |
| HDL PL (mg/dl)    | 74.07 | 15.27 | 84.10 | 20.51 | 62.34 | 21.24 | -11.9 | 0.104254  | 18.8  | 0.055888 | -25.9 | 0.000014  |
| HDL-1 PL (mg/dl)  | 26.47 | 8.60  | 25.32 | 12.42 | 19.59 | 10.68 | 4.6   | 0.755473  | 35.1  | 0.042246 | -22.6 | 0.047582  |
| HDL-2 PL (mg/dl)  | 18.69 | 3.72  | 15.24 | 5.07  | 13.42 | 3.57  | 22.7  | 0.024289  | 39.3  | 0.000117 | -11.9 | 0.132553  |

|                     |        |       |        |       |        |       |       |           |       |          |       |           |
|---------------------|--------|-------|--------|-------|--------|-------|-------|-----------|-------|----------|-------|-----------|
| HDL-3 PL (mg/dl)    | 15.94  | 3.61  | 16.95  | 4.25  | 13.17  | 4.00  | -6.0  | 0.430053  | 21.0  | 0.022157 | -22.3 | 0.000133  |
| HDL-4 PL (mg/dl)    | 12.97  | 8.24  | 25.97  | 5.05  | 16.88  | 7.25  | -50.0 | <0,000001 | -23.2 | 0.199888 | -35.0 | <0,000001 |
| ApoA1 (mg/dl)       | 104.15 | 20.70 | 152.53 | 25.99 | 102.27 | 25.68 | -31.7 | <0,000001 | 1.8   | 0.629963 | -33.0 | <0,000001 |
| HDL ApoA1 (mg/dl)   | 104.17 | 23.55 | 153.01 | 28.47 | 103.84 | 25.33 | -31.9 | <0,000001 | 0.3   | 0.799226 | -32.1 | <0,000001 |
| HDL-1 ApoA1 (mg/dl) | 28.86  | 11.51 | 33.12  | 17.80 | 25.80  | 17.22 | -12.9 | 0.421547  | 11.9  | 0.457709 | -22.1 | 0.068653  |
| HDL-2 ApoA1 (mg/dl) | 19.35  | 4.58  | 21.36  | 5.69  | 16.11  | 5.72  | -9.4  | 0.242913  | 20.2  | 0.062705 | -24.6 | 0.000146  |
| HDL-3 ApoA1 (mg/dl) | 24.41  | 5.01  | 27.98  | 6.51  | 21.21  | 4.57  | -12.7 | 0.069745  | 15.1  | 0.030979 | -24.2 | 0.000007  |
| HDL-4 ApoA1 (mg/dl) | 30.44  | 18.89 | 69.57  | 12.97 | 39.71  | 16.84 | -56.3 | <0,000001 | -23.4 | 0.174768 | -42.9 | <0,000001 |
| ApoA2 (mg/dl)       | 24.70  | 6.75  | 33.68  | 5.50  | 18.96  | 7.22  | -26.6 | <0,000001 | 30.3  | 0.014853 | -43.7 | <0,000001 |
| HDL ApoA2 (mg/dl)   | 27.92  | 6.43  | 33.86  | 5.27  | 21.25  | 7.40  | -17.5 | 0.000468  | 31.4  | 0.003966 | -37.2 | <0,000001 |
| HDL-1 ApoA2 (mg/dl) | 3.86   | 1.09  | 3.57   | 1.83  | 2.39   | 1.47  | 8.2   | 0.585283  | 61.8  | 0.003047 | -33.1 | 0.009060  |
| HDL-2 ApoA2 (mg/dl) | 4.48   | 0.71  | 4.30   | 1.33  | 2.62   | 1.07  | 4.3   | 0.636109  | 71.2  | 0.000002 | -39.1 | <0,000001 |
| HDL-3 ApoA2 (mg/dl) | 6.78   | 1.53  | 7.06   | 1.61  | 4.43   | 1.68  | -4.1  | 0.560885  | 53.0  | 0.00008  | -37.3 | <0,000001 |
| HDL-4 ApoA2 (mg/dl) | 8.22   | 5.92  | 17.99  | 4.35  | 9.12   | 4.56  | -54.3 | <0,000001 | -9.9  | 0.692616 | -49.3 | <0,000001 |
| VLDL ApoB (mg/dl)   | 17.01  | 4.40  | 8.80   | 5.06  | 10.29  | 3.90  | 93.4  | <0,000001 | 65.3  | 0.000169 | 17.0  | 0.087014  |
| IDL ApoB (mg/dl)    | 10.73  | 4.25  | 5.69   | 2.74  | 5.61   | 3.54  | 88.4  | <0,000001 | 91.2  | 0.001082 | -1.4  | 0.717293  |
| LDL ApoB (mg/dl)    | 76.99  | 31.06 | 72.75  | 20.70 | 57.32  | 21.81 | 5.8   | 0.527487  | 34.3  | 0.022559 | -21.2 | 0.001046  |
| LDL-1 ApoB (mg/dl)  | 21.63  | 11.39 | 11.52  | 3.57  | 13.38  | 6.80  | 87.7  | <0,000001 | 61.6  | 0.006628 | 16.1  | 0.025375  |
| LDL-2 ApoB (mg/dl)  | 10.60  | 3.46  | 10.75  | 3.49  | 12.02  | 4.08  | -1.4  | 0.892490  | -11.8 | 0.292876 | 11.9  | 0.207721  |
| LDL-3 ApoB (mg/dl)  | 10.13  | 6.44  | 10.03  | 4.07  | 7.88   | 4.12  | 1.0   | 0.940301  | 28.6  | 0.125808 | -21.5 | 0.011995  |



|                    |       |       |       |      |       |       |       |          |      |          |       |          |
|--------------------|-------|-------|-------|------|-------|-------|-------|----------|------|----------|-------|----------|
| LDL-4 ApoB (mg/dl) | 7.45  | 8.27  | 9.83  | 5.93 | 4.32  | 6.37  | -24.2 | 0.213101 | 72.6 | 0.144721 | -56.1 | 0.000082 |
| LDL-5 ApoB (mg/dl) | 8.68  | 7.39  | 12.17 | 5.65 | 6.12  | 6.24  | -28.7 | 0.052775 | 41.7 | 0.190003 | -49.7 | 0.000008 |
| LDL-6 ApoB (mg/dl) | 14.87 | 10.95 | 19.48 | 9.91 | 13.08 | 11.10 | -23.7 | 0.134526 | 13.7 | 0.469536 | -32.9 | 0.003502 |

**Table S2.** Spearman Correlation for metabolites and lipoproteins against the Anti-S1 IgG-titer in COVID-19, HC, and CS cohorts.

|                | Glycine | ApoA2   | LDL-6<br>Particles | HDL-<br>ApoA2 | LDL-6 TG | LDL-6<br>Chol | LDL-5 FC | LDL-6 FC | LDL-6 PL | LDL-6<br>ApoB | HDL-4<br>Chol | HDL-4 FC | HDL-4 PL | ApoA1   | ApoA2   |
|----------------|---------|---------|--------------------|---------------|----------|---------------|----------|----------|----------|---------------|---------------|----------|----------|---------|---------|
| Spearman r     | 0.5101  | -0.4146 | -0.5099            | -0.4126       | -0.3905  | -0.5051       | -0.4593  | -0.5535  | -0.4938  | -0.5099       | -0.4949       | -0.4092  | -0.4952  | -0.5011 | -0.5257 |
| P value        |         |         |                    |               |          |               |          |          |          |               |               |          |          |         |         |
| P (two-tailed) | 0.0029  | 0.0183  | 0.0029             | 0.0189        | 0.0271   | 0.0032        | 0.0082   | 0.001    | 0.0041   | 0.0029        | 0.004         | 0.0201   | 0.004    | 0.0035  | 0.002   |



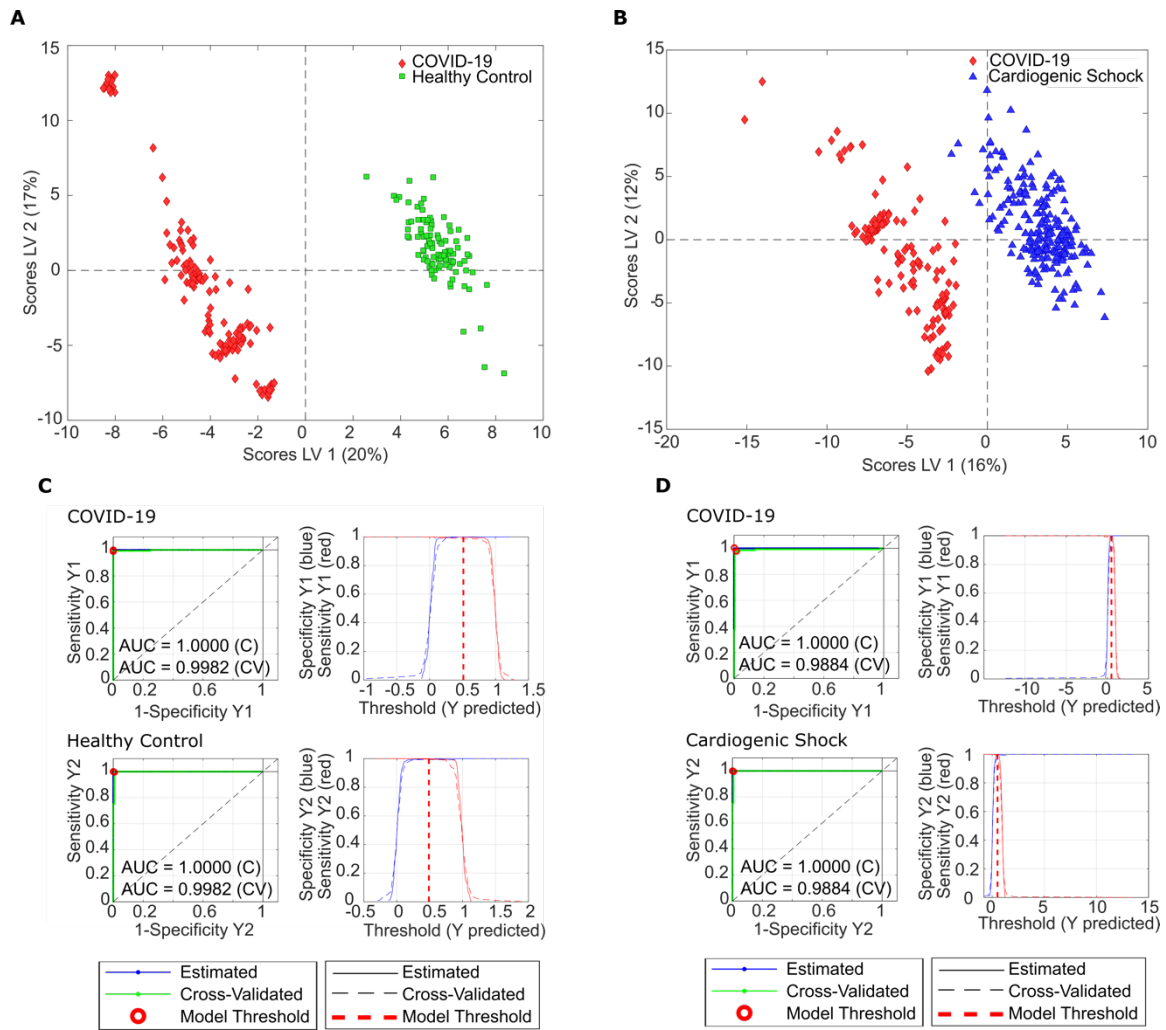

**Supplementary Figure 1.** A PLS-DA for COVID-19 vs. Healthy Controls. The ROC analysis in **C** indicates a significance for the separation of the two groups. **B** PLS-DA of COVID-19 vs. Cardiogenic Shock shows a good grouping for the two groups. A good separation model was validated by a ROC analysis (**D**).

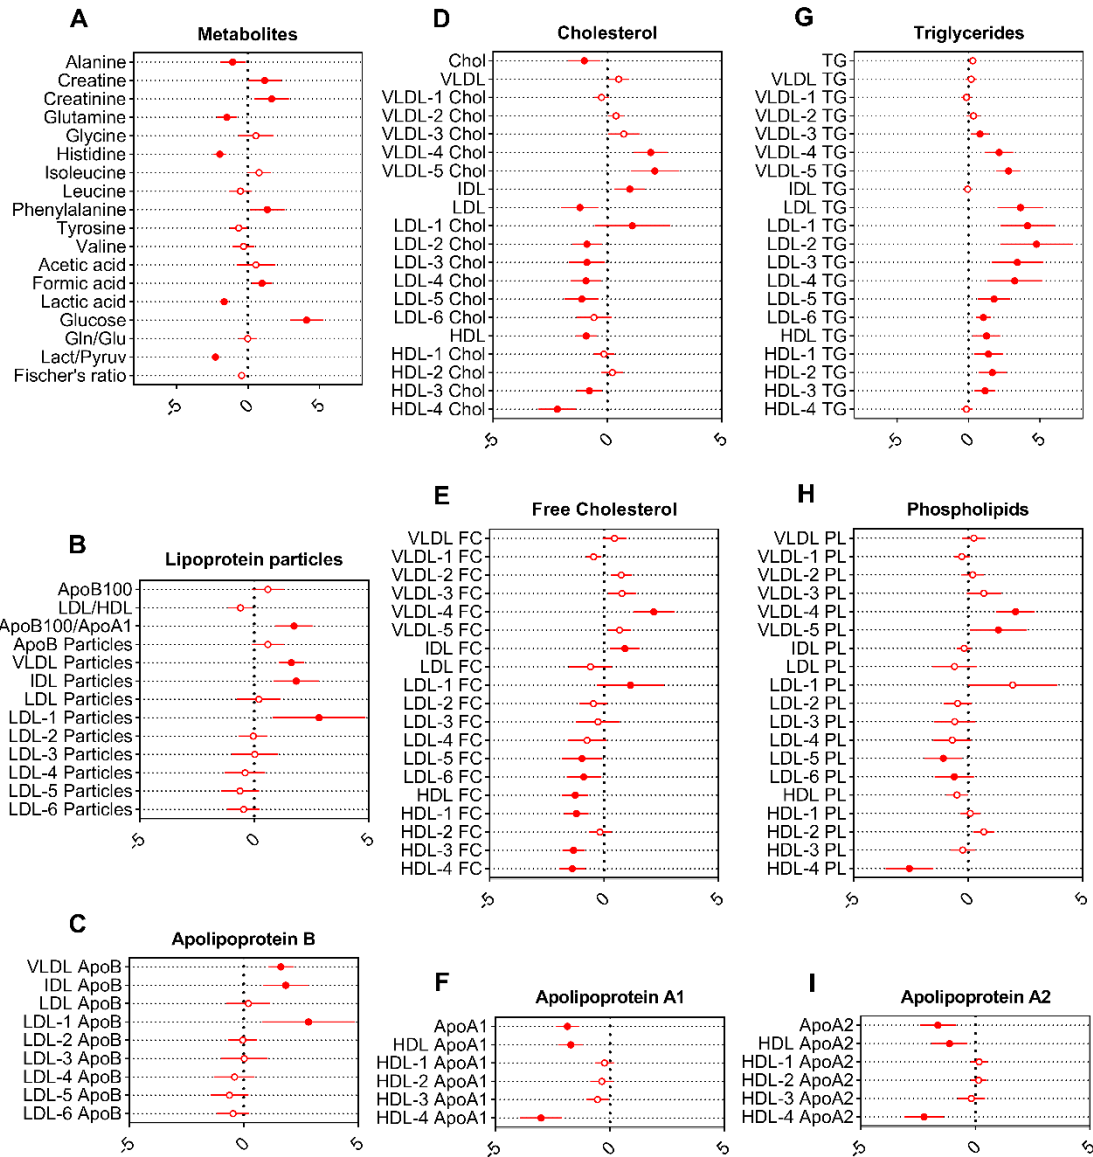

**Supplementary Figure 2.** Forest plots showing changes for groups of metabolites (A) and lipoprotein classes (B-I). The middle line indicates the reference average whereas circles on the horizontal axes show changes scaled by standard deviations. Red circles show changes for COVID-19 samples compared to healthy controls as the reference (vertical line). Statistically significant differences between COVID-19 to HC determined using the false discovery method of Benjamini, Krieger and Yekutieli ( $Q = 1\%$ ) are indicated by filled circles.

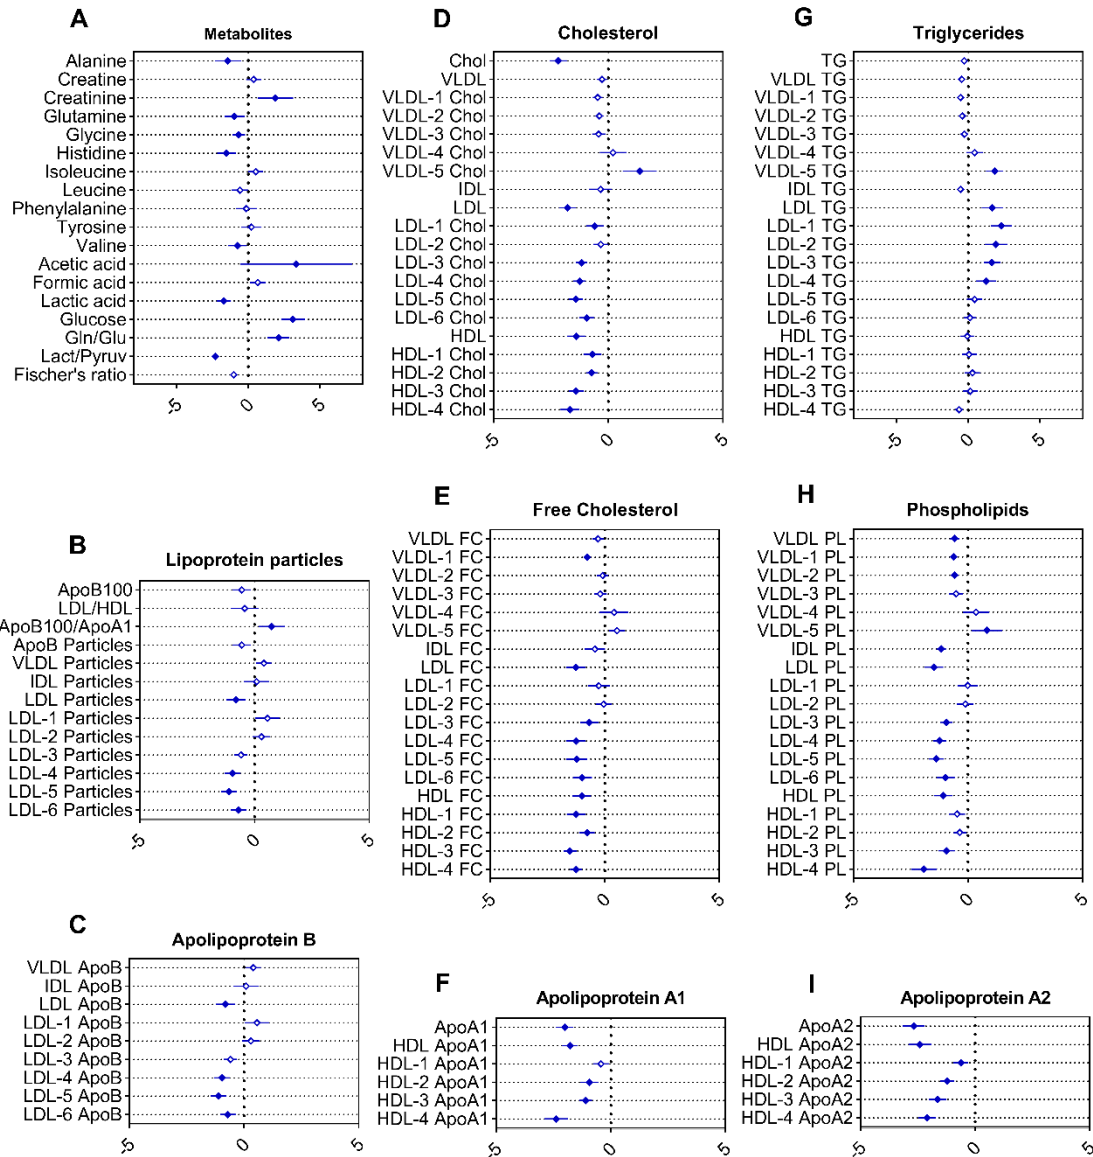

**Supplementary Figure 3.** Forest plots showing changes for groups of metabolites (A) and lipoprotein classes (B-I). The middle line indicates the reference average whereas diamonds on the horizontal axes show changes scaled by standard deviations. Blue diamonds show changes for CS samples compared to healthy controls as the reference (vertical line). Statistically significant differences between CS to HC determined using the false discovery method of Benjamini, Krieger and Yekutieli ( $Q = 1\%$ ) are indicated by filled diamonds.

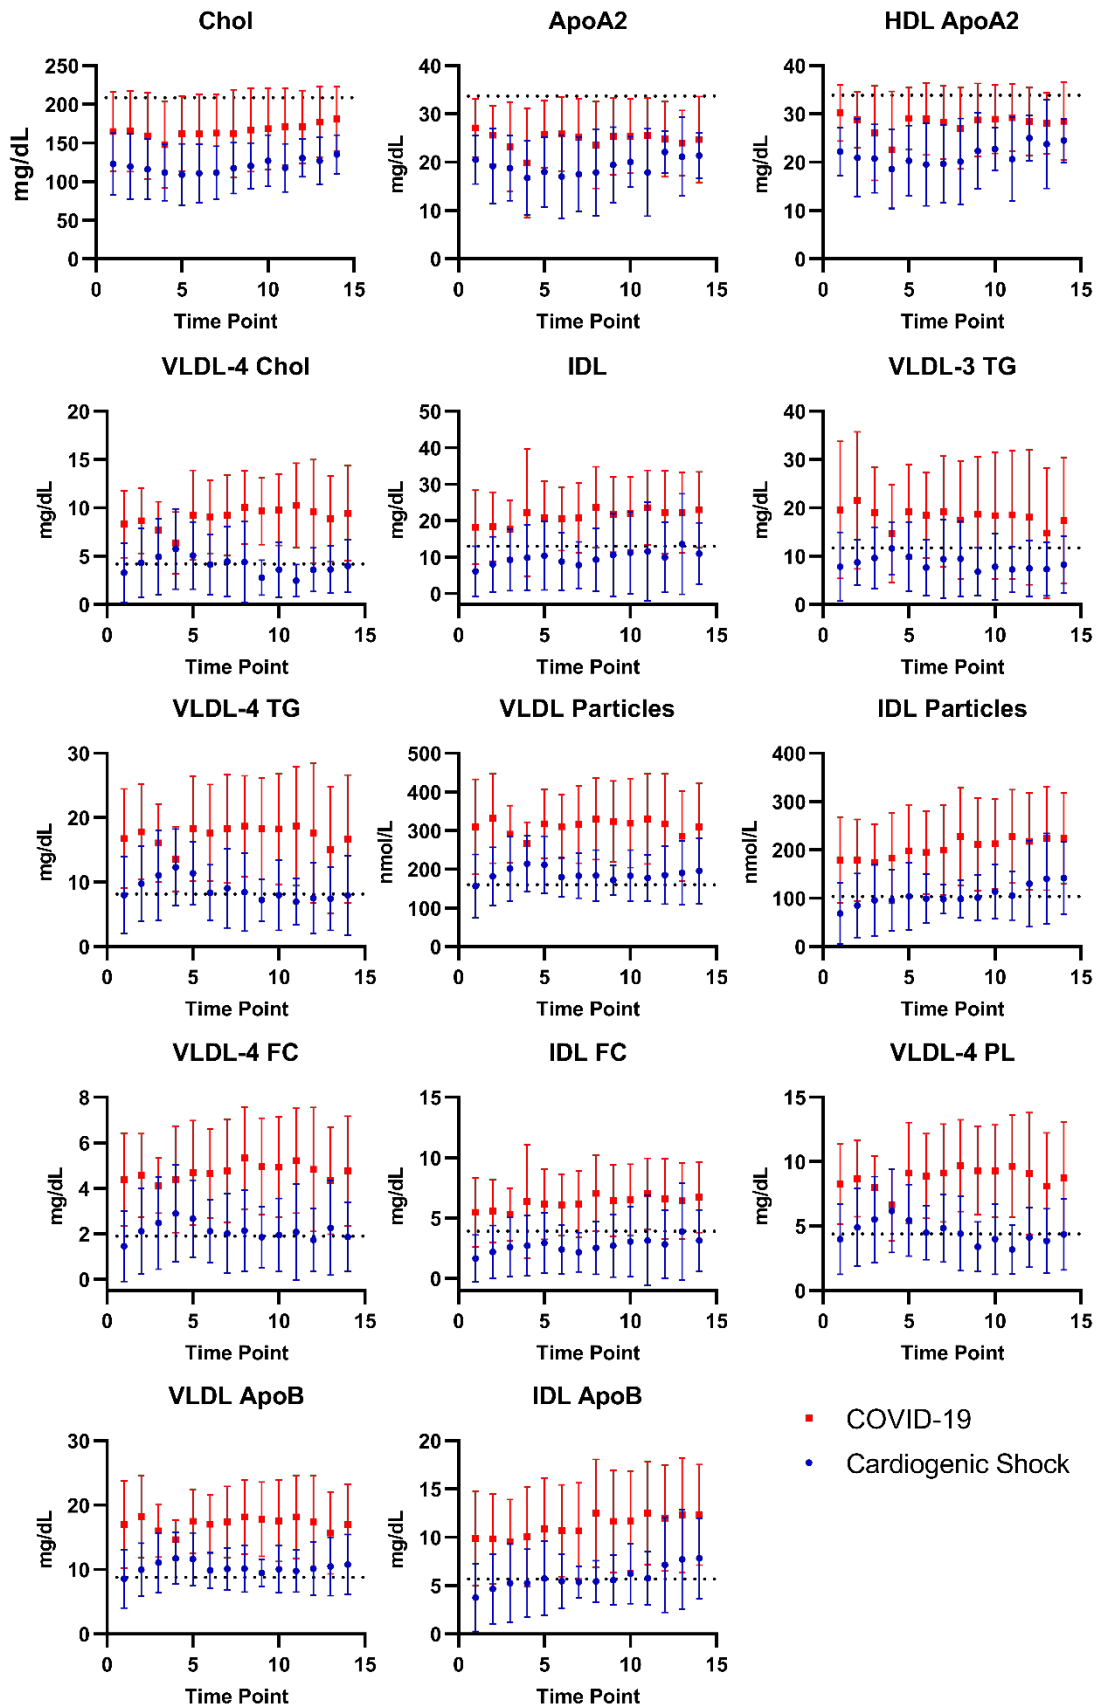

**Supplementary Figure 4.** Time courses of lipoproteins (mean and standard deviation) that are significant for the both comparison of COVID-19 to HC and CS allows to differentiate between COVID-19 (red) and cardiogenic shock (blue) showing a continuous progression for COVID-19; the dotted line represents the mean value for healthy controls.



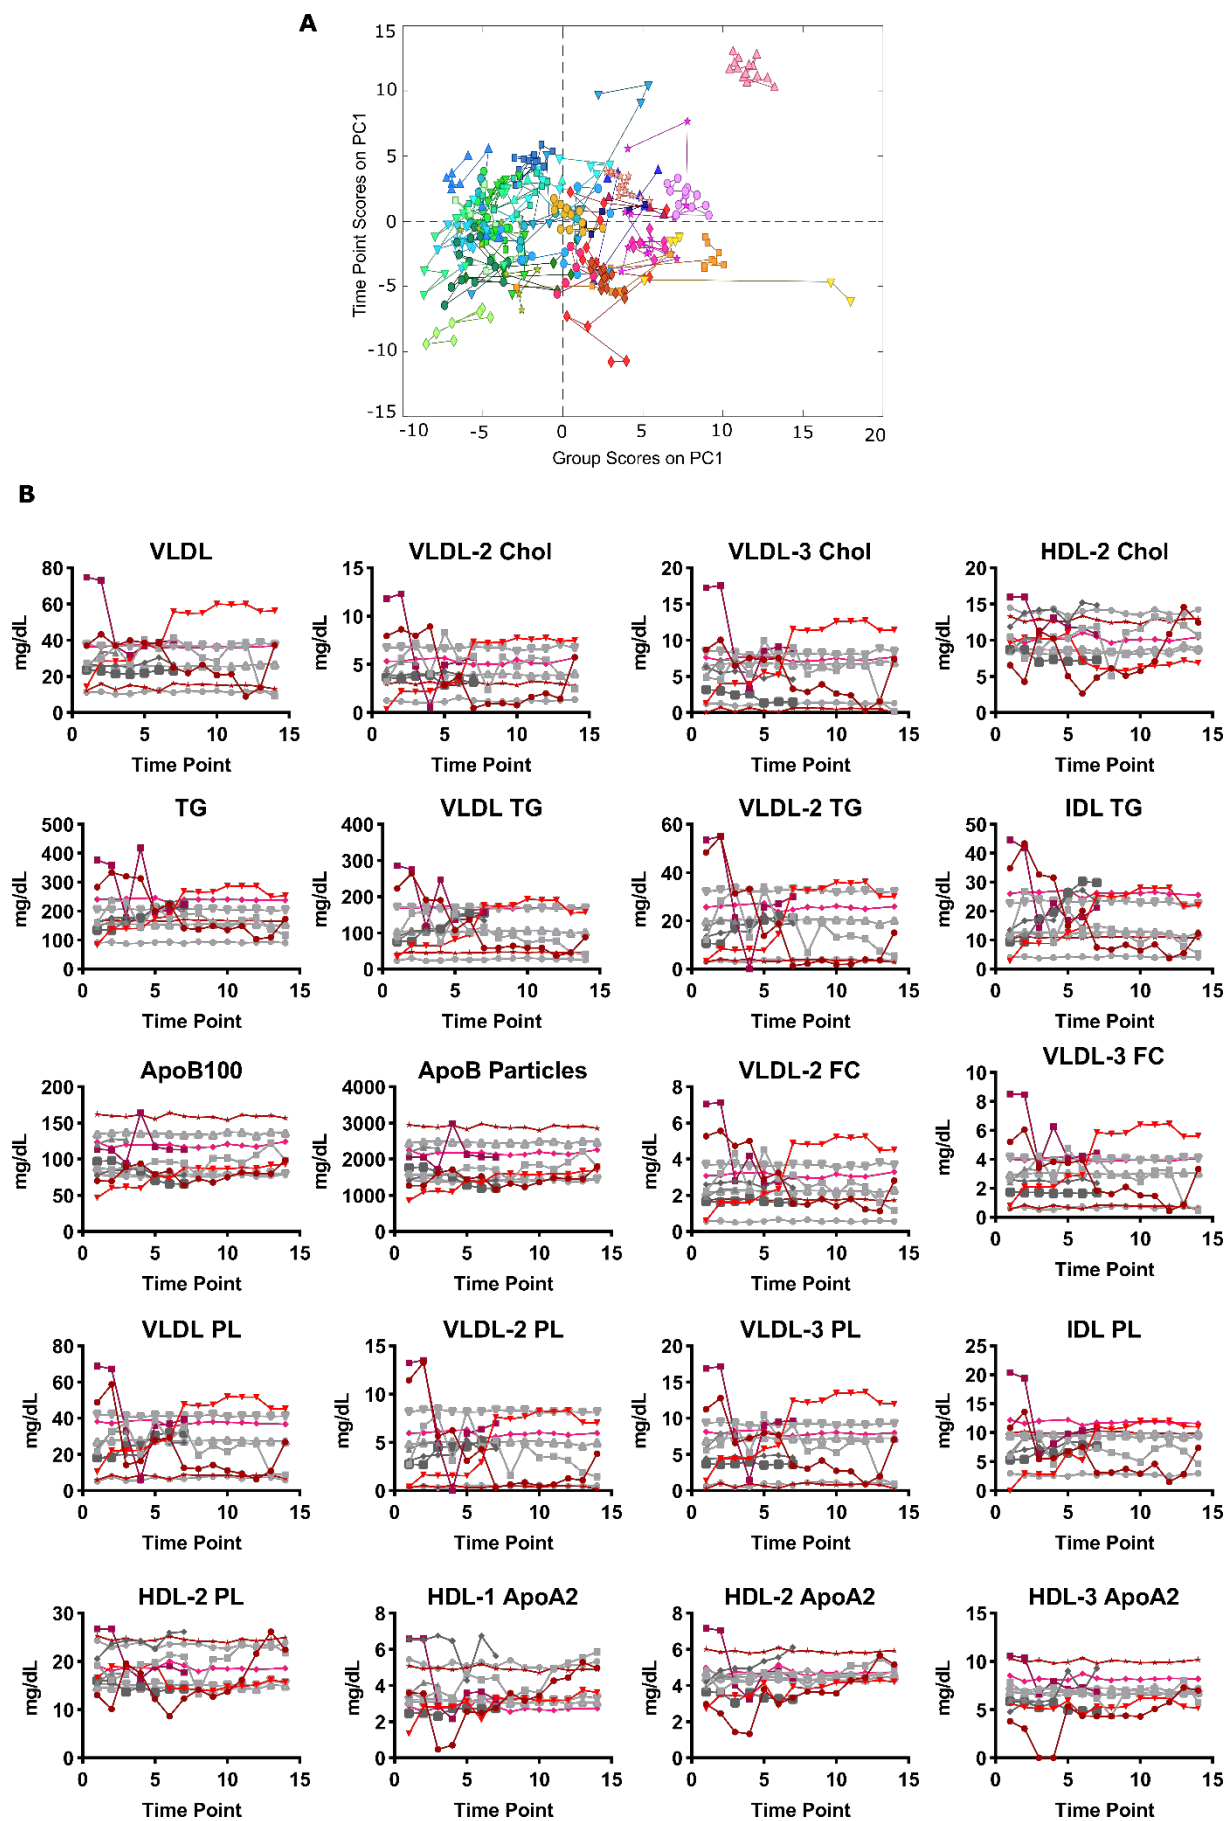

**Supplementary Figure 5.** A ASCA analysis of COVID-19 (warm colors in yellow and red) vs. cardiogenic shock (cold colors in blue and green) samples showing a separation between the groups in consideration of the

different groups and time points. **B** Time courses of lipoproteins for COVID-19 patients that are only significant for the comparison of COVID-19 vs. CS showing striking progressions over time for some patients (highlighted in red).

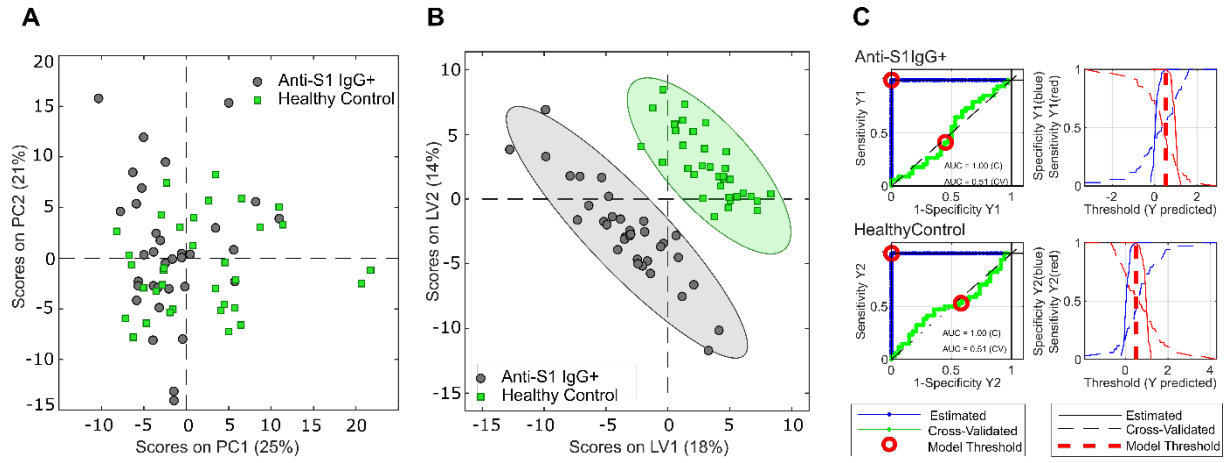

**Supplementary Figure 6.** **A** PCA and **B** PLS-DA for Anti-S1 IgG+ vs. age- and sex-matched Healthy Controls. The ROC analysis in **C** shows no significance for the separation of the two groups.

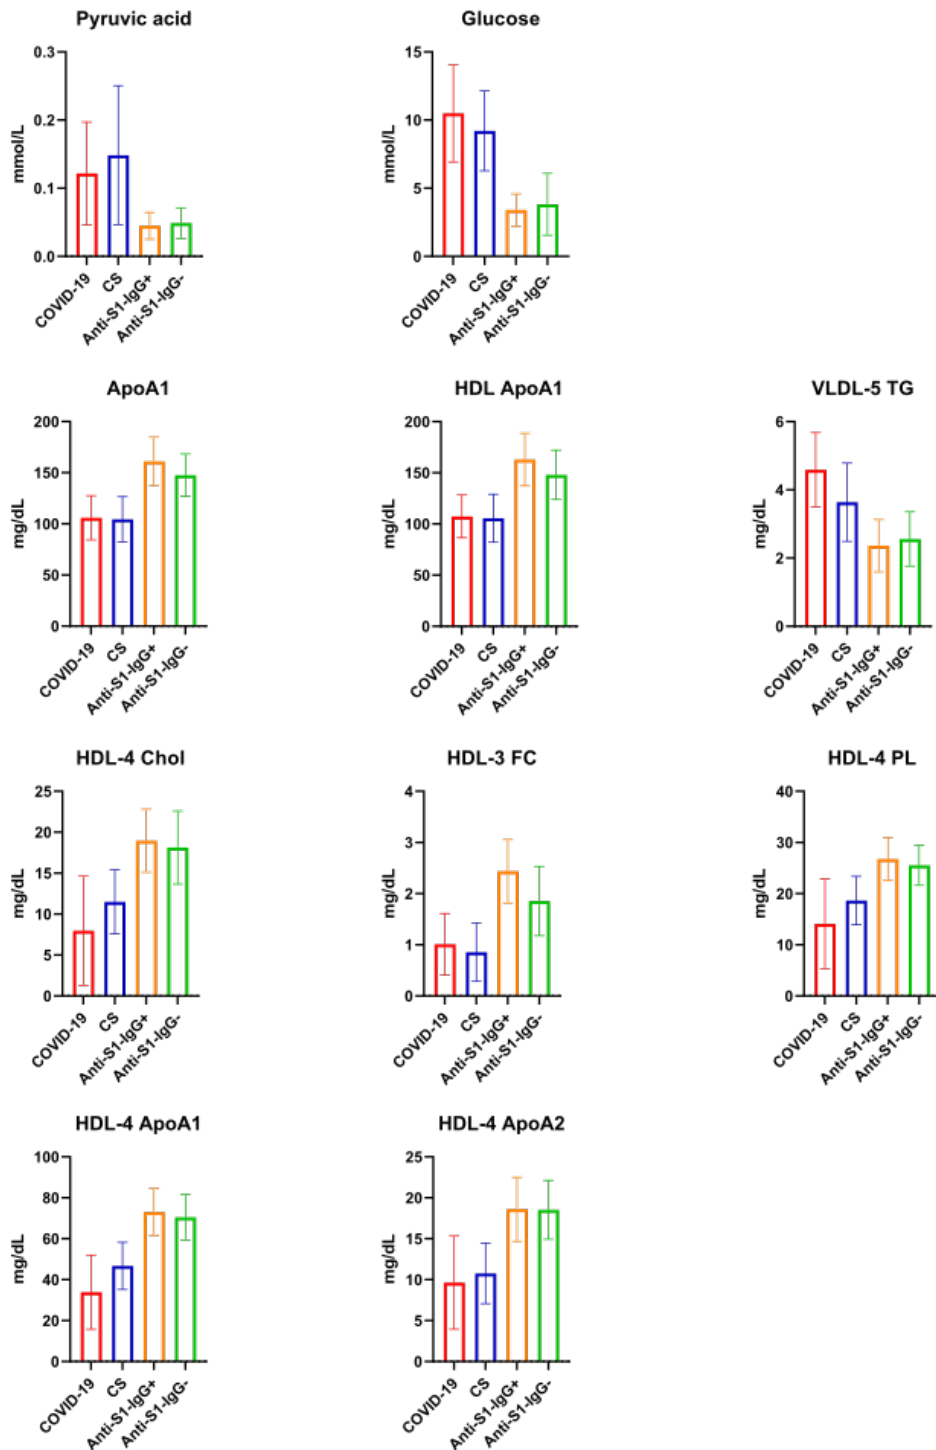

**Supplementary Figure 7.** Metabolites and lipoproteins significantly changed between (1) COVID-19 vs. Anti-SARS-CoV-2 IgG+ individuals (Anti-S1-IgG+), (2) COVID-19 vs. Anti-SARS-CoV-2 IgG-antibodies (Anti-S1-IgG-), (3) CS vs. Anti-S1-IgG+, (4) CS vs. Anti-S1-IgG determined using multiple unpaired t-test with the false discovery method of Benjamini, Krieger and Yekutieli (Q = 1%).
